# Supplementary material for: T cell receptor repertoires of mice and humans are clustered in similarity networks around conserved public CDR3 sequences
Source: eLife journal article supplement (doi:10.7554/elife.22057), 2017-07-19
Supplement: supp [file elife-22057-supp-v1.zip]

Archive with 20 entries (20 files):
- elife_poa_e22057_Figure_1_figure_supplement_2.pdf
- elife_poa_e22057_Figure_1_figure_supplement_4.pdf
- elife_poa_e22057_Figure_2_figure_supplement_3.pdf
- elife_poa_e22057_Figure_2_figure_supplement_2.pdf
- elife_poa_e22057_Supplementary_File_2.docx
- elife_poa_e22057_Supplementary_File_1.docx
- elife_poa_e22057_Figure_3_figure_supplement_1.pdf
- elife_poa_e22057_Figure_5_figure_supplement_4.pdf
- elife_poa_e22057_Figure_5_figure_supplement_3.pdf
- elife_poa_e22057_Figure_4_figure_supplement_1.pdf
- elife_poa_e22057_Figure_5_figure_supplement_2.pdf
- elife_poa_e22057_Figure_2_figure_supplement_4.pdf
- elife_poa_e22057_Figure_1_figure_supplement_5.pdf
- elife_poa_e22057_Figure_5_figure_supplement_1.pdf
- elife_poa_e22057_Figure_1_figure_supplement_3.pdf
- elife_poa_e22057_Supplementary_File_3.docx
- elife_poa_e22057_Figure_2_figure_supplement_1.pdf
- elife_poa_e22057_Figure_1_figure_supplement_1.pdf
- elife_poa_e22057_Figure_1_figure_supplement_6.pdf
- elife_poa_e22057_Figure_5_figure_supplement_5.pdf
