# Supplementary figures and images for: T cell receptor repertoires of mice and humans are clustered in similarity networks around conserved public CDR3 sequences
Source: eLife journal article supplement (doi:10.7554/elife.22057), 2017-07-19

Figure 1- figure supplement 2

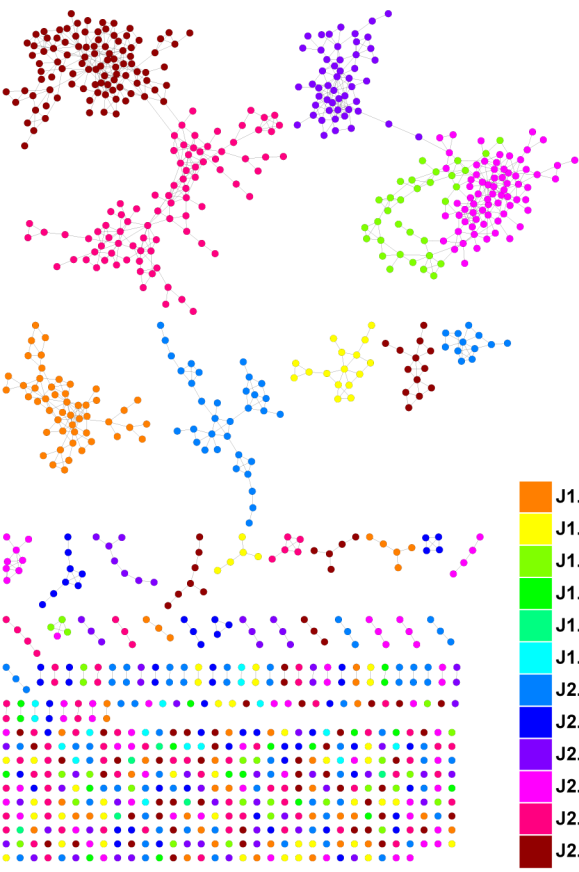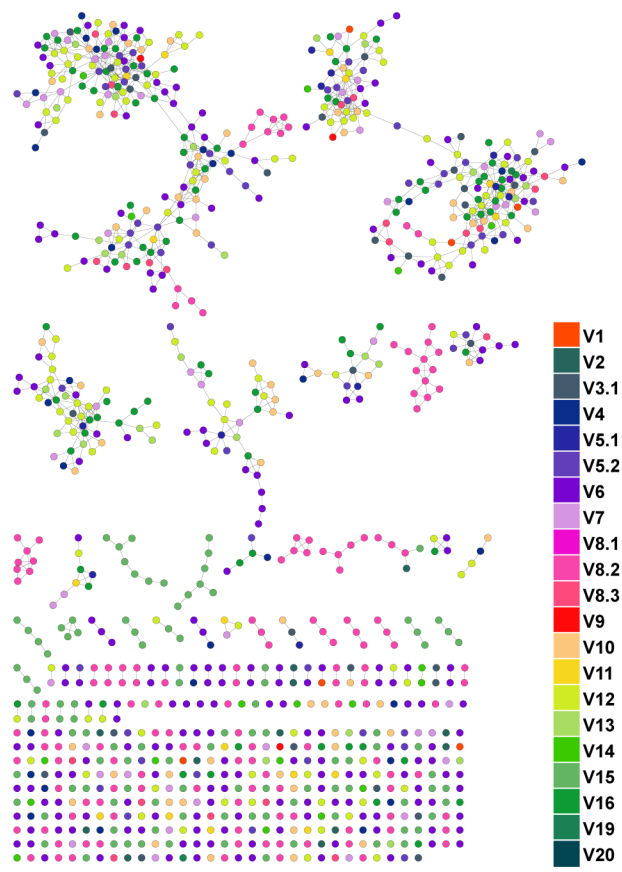

Supplement: supp [file elife-22057-supp-v1.zip › elife_poa_e22057_Figure_1_figure_supplement_2.pdf]

Figure 1- figure supplement 4

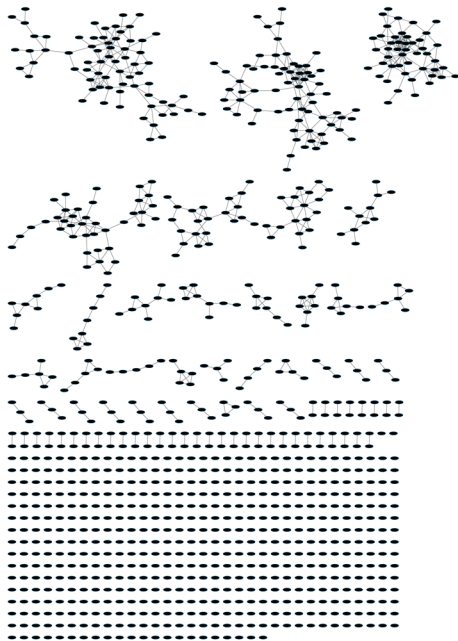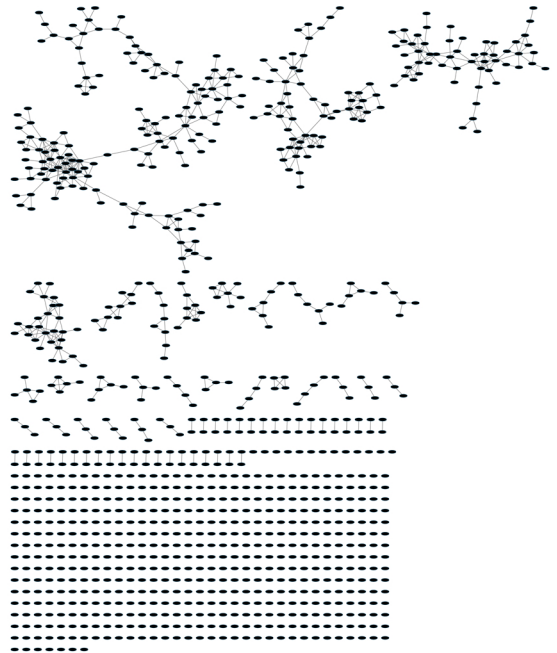

Supplement: supp [file elife-22057-supp-v1.zip › elife_poa_e22057_Figure_1_figure_supplement_4.pdf]

## Mean Degree of CS in Humans vs Mice

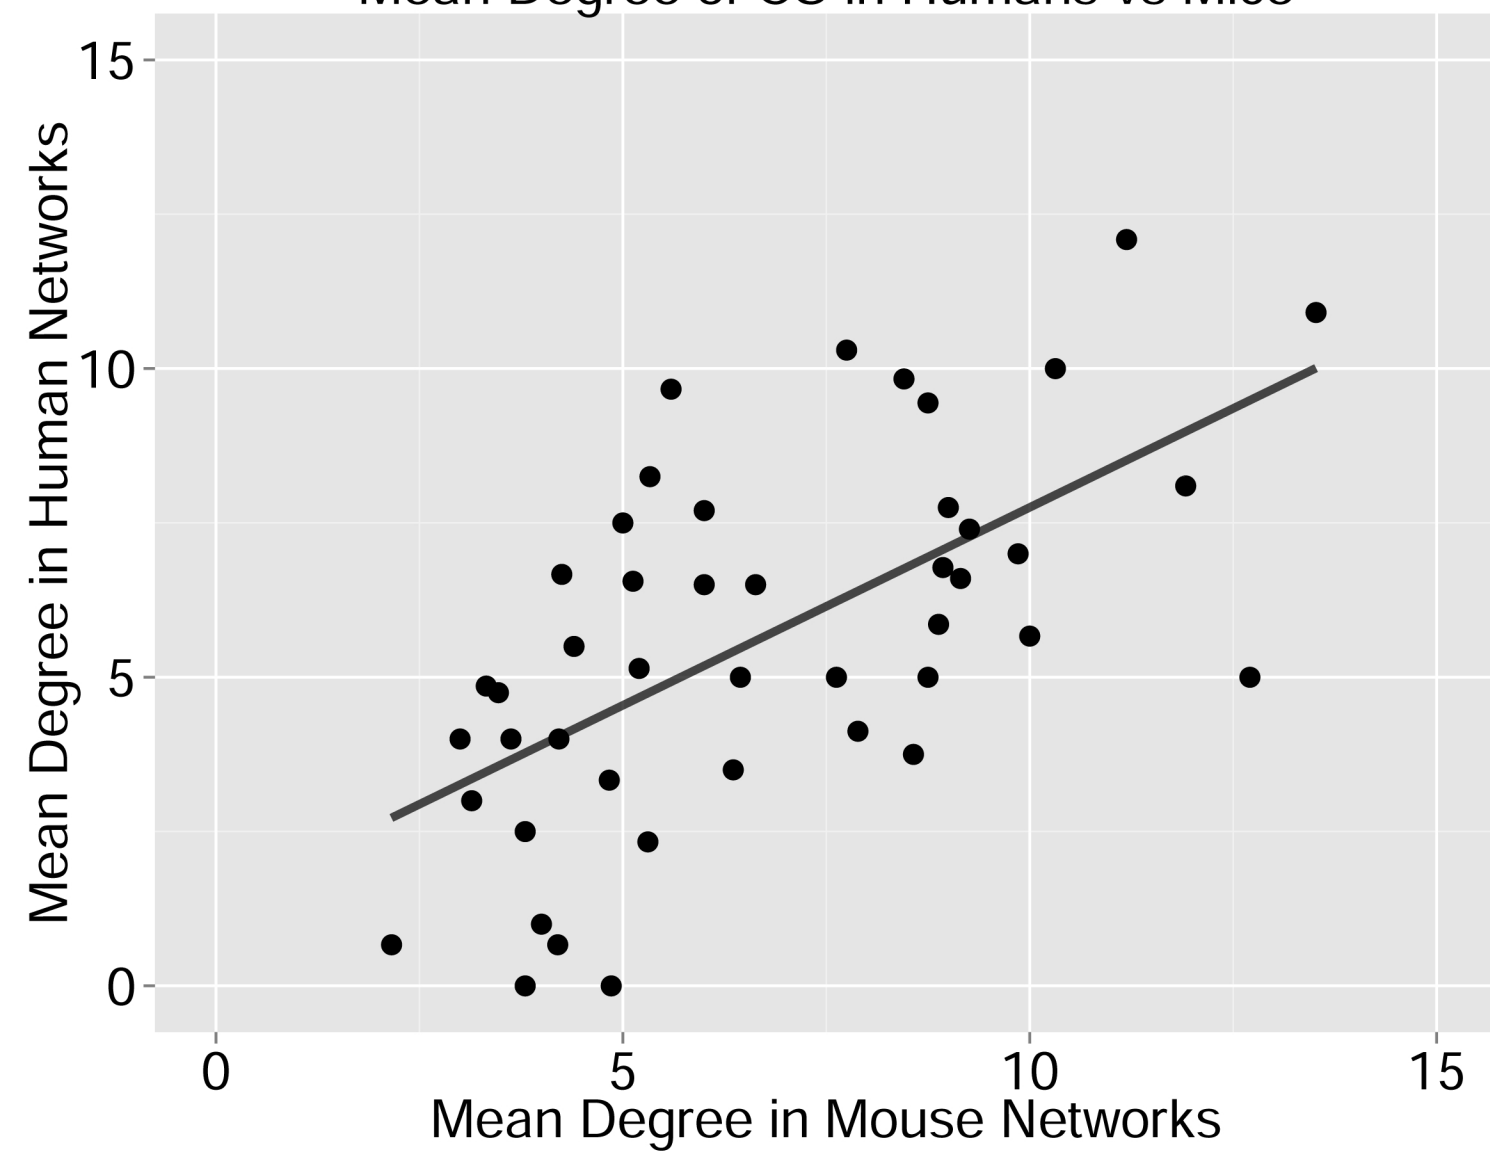

Supplement: supp [file elife-22057-supp-v1.zip › elife_poa_e22057_Figure_2_figure_supplement_3.pdf]

Figure 2 - figure supplement 2

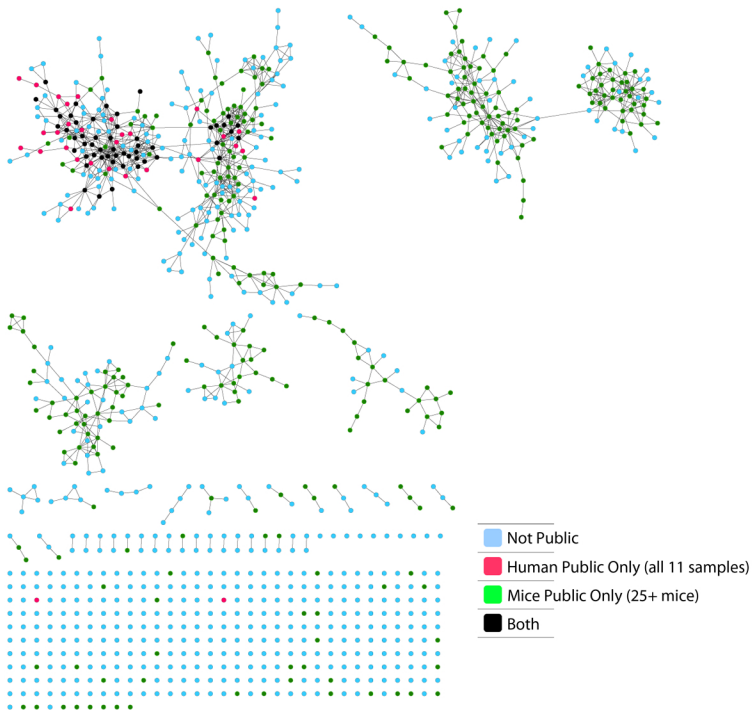

Supplement: supp [file elife-22057-supp-v1.zip › elife_poa_e22057_Figure_2_figure_supplement_2.pdf]

Figure 3 - figure supplement 1

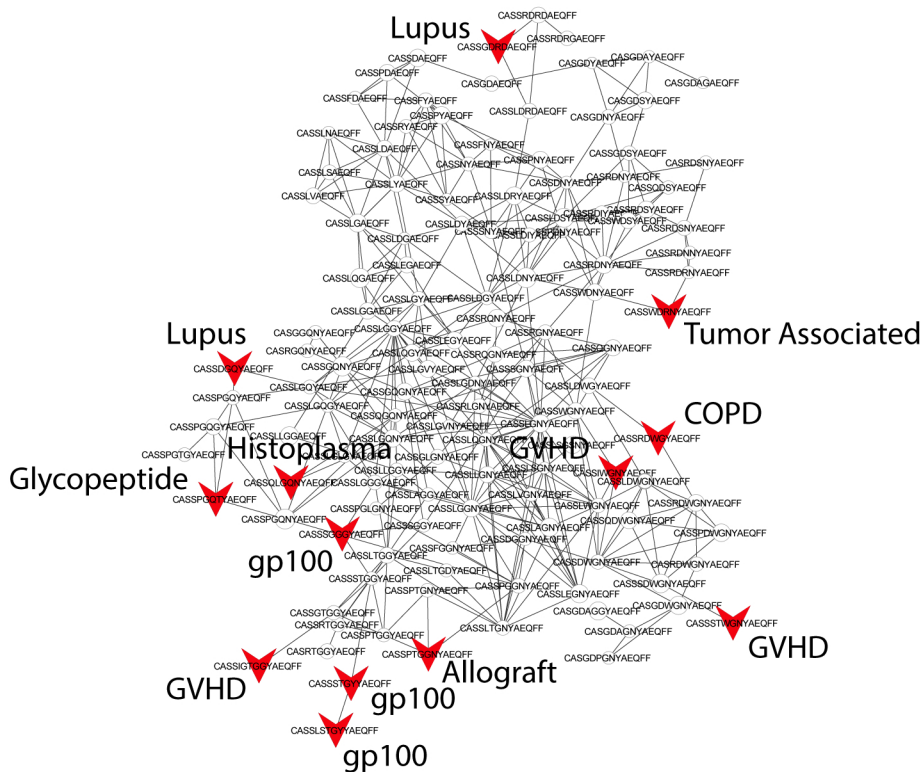

Supplement: supp [file elife-22057-supp-v1.zip › elife_poa_e22057_Figure_3_figure_supplement_1.pdf]

Figure 5 - figure supplement 4

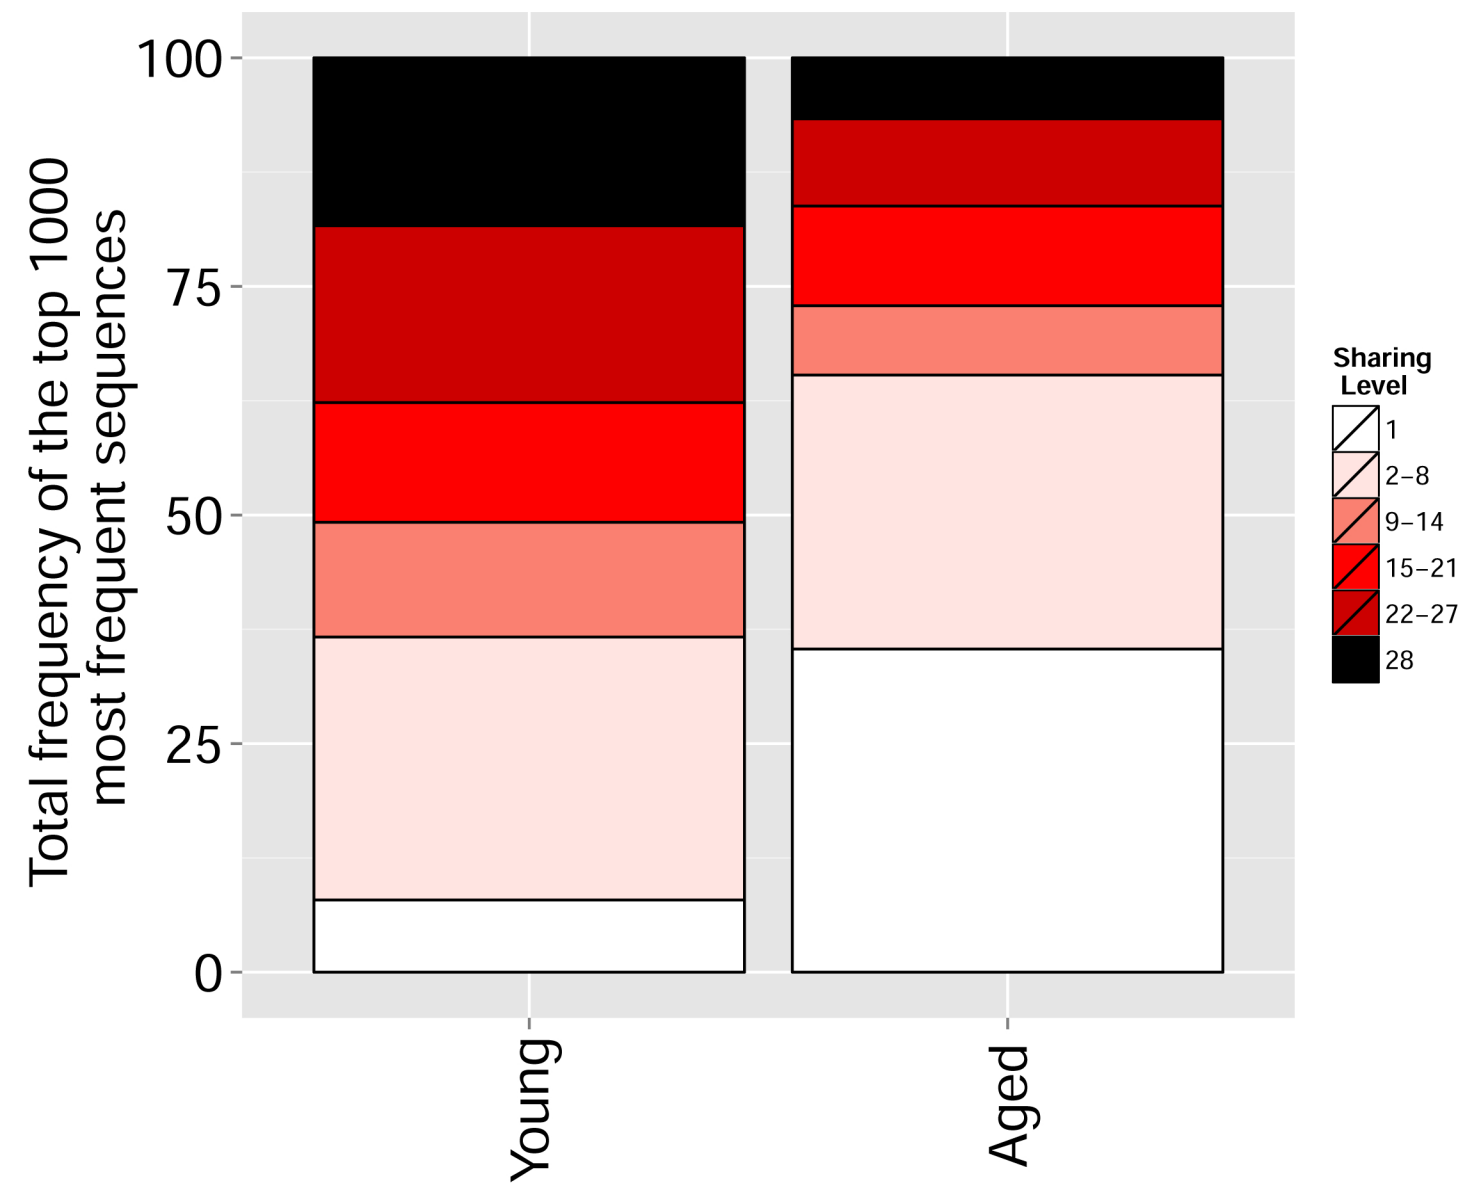

Supplement: supp [file elife-22057-supp-v1.zip › elife_poa_e22057_Figure_5_figure_supplement_4.pdf]

Figure 5 - figure supplement 3

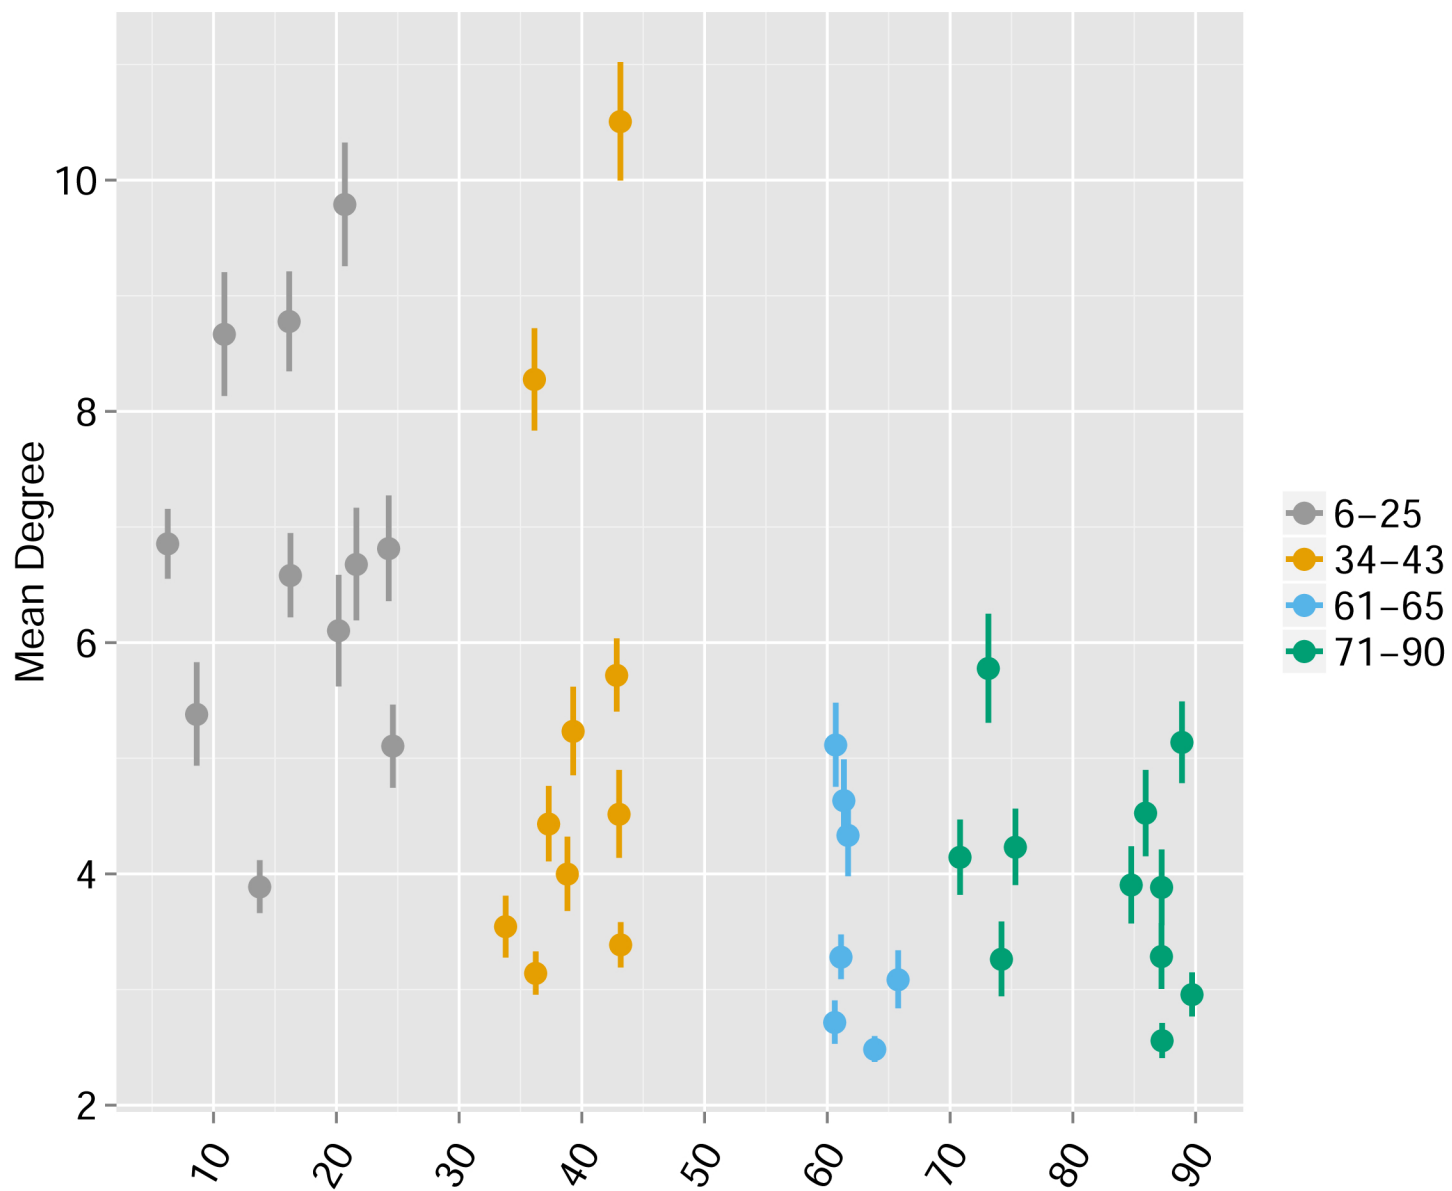

Supplement: supp [file elife-22057-supp-v1.zip › elife_poa_e22057_Figure_5_figure_supplement_3.pdf]

## Number of unique nt sequences for CDR3 AA per sample

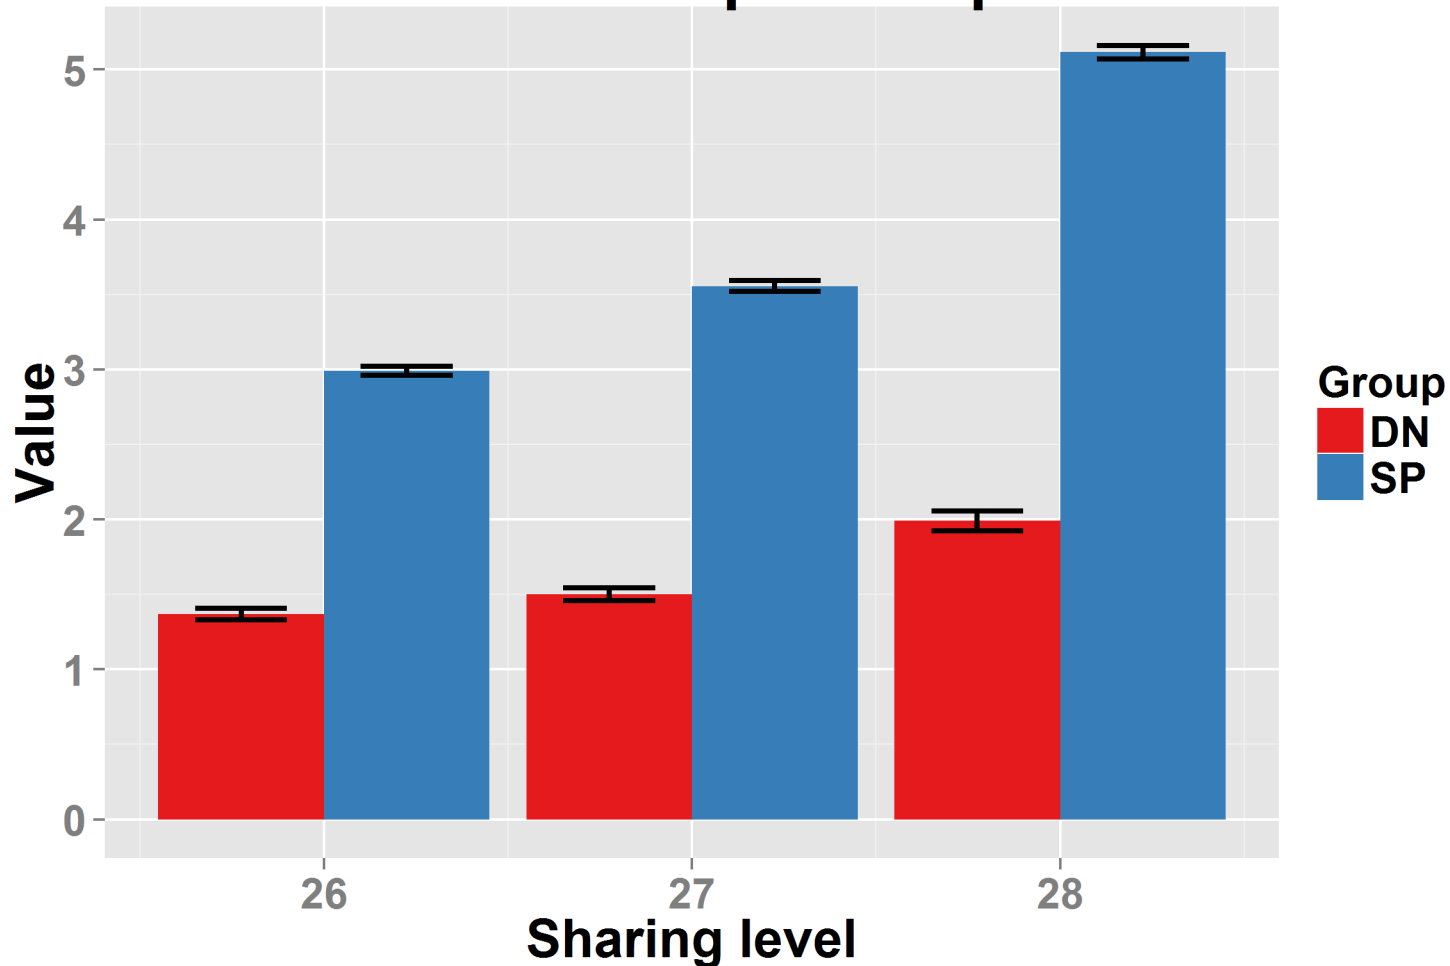

Supplement: supp [file elife-22057-supp-v1.zip › elife_poa_e22057_Figure_4_figure_supplement_1.pdf]

Figure 5 - figure supplement 2

A

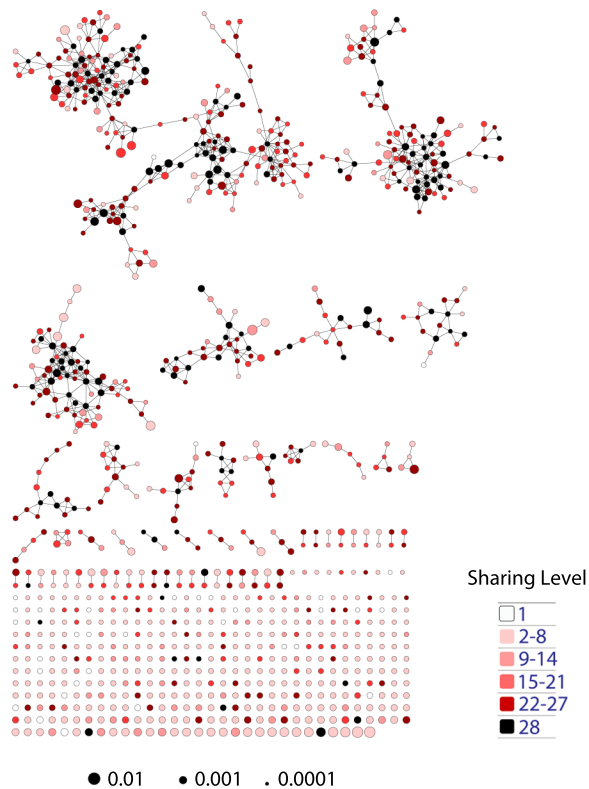

B

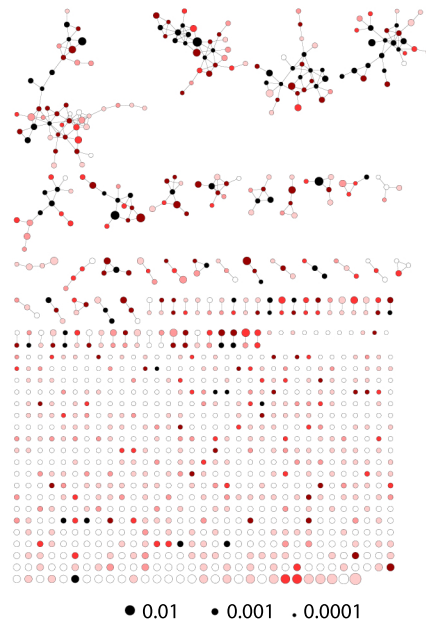

Supplement: supp [file elife-22057-supp-v1.zip › elife_poa_e22057_Figure_5_figure_supplement_2.pdf]

Figure 2 - figure supplement 4

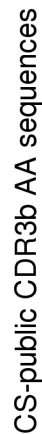

Supplement: supp [file elife-22057-supp-v1.zip › elife_poa_e22057_Figure_2_figure_supplement_4.pdf]

Figure 1- figure supplement 5

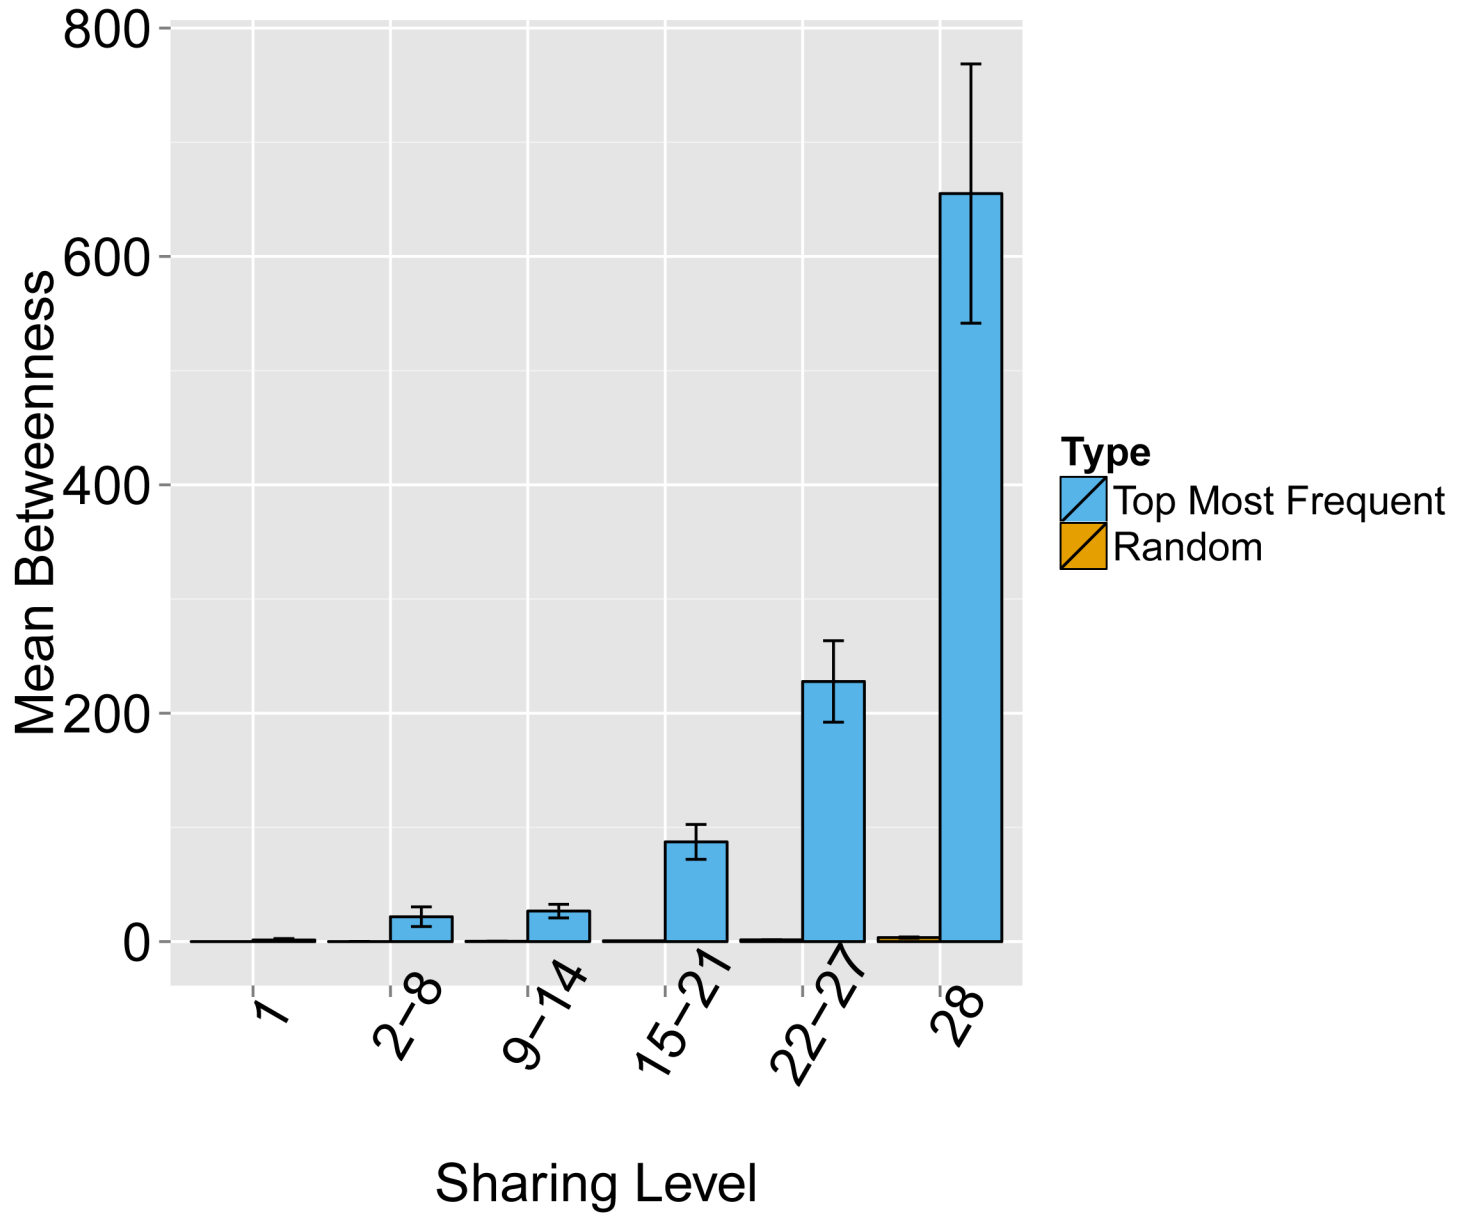

Supplement: supp [file elife-22057-supp-v1.zip › elife_poa_e22057_Figure_1_figure_supplement_5.pdf]

Figure 5 - figure supplement 1

A

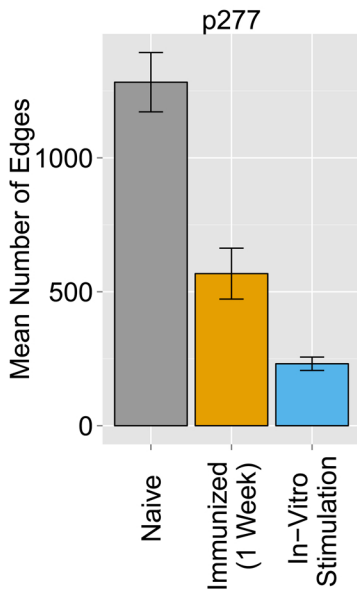

B

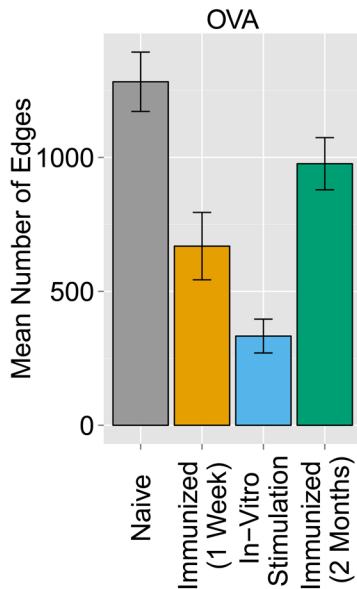

Supplement: supp [file elife-22057-supp-v1.zip › elife_poa_e22057_Figure_5_figure_supplement_1.pdf]

Figure 1- figure supplement 3

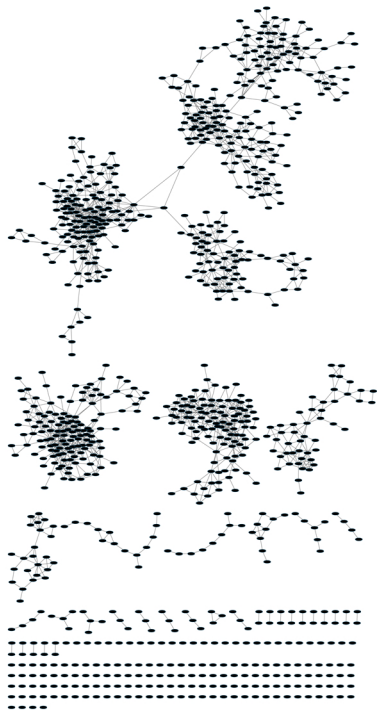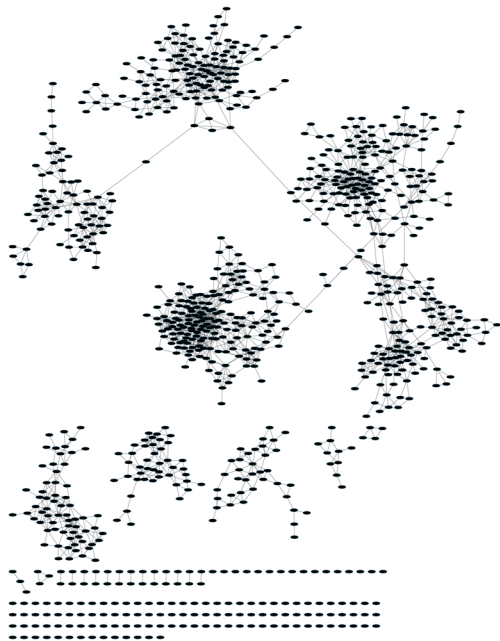

Supplement: supp [file elife-22057-supp-v1.zip › elife_poa_e22057_Figure_1_figure_supplement_3.pdf]

Figure 2 - figure supplement 1

A

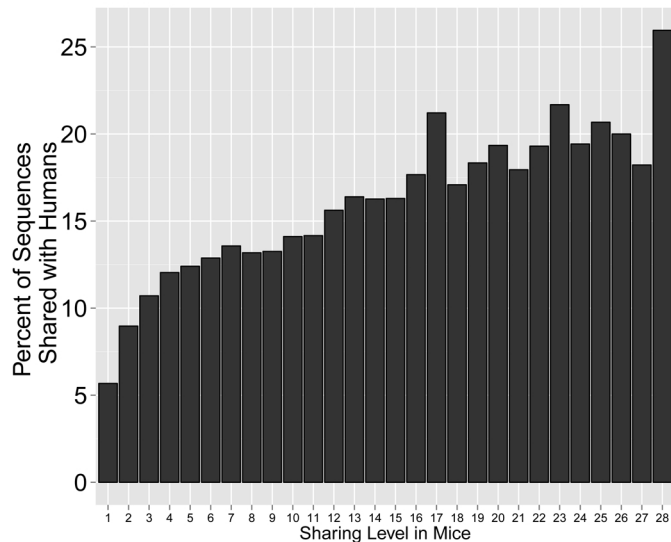

B

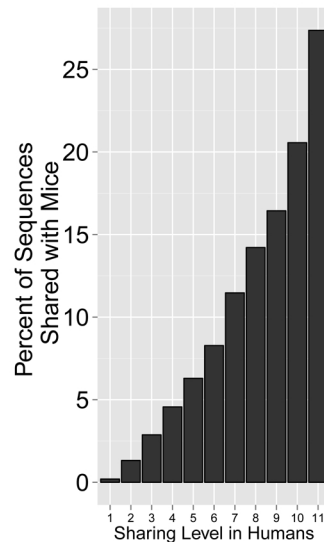

Supplement: supp [file elife-22057-supp-v1.zip › elife_poa_e22057_Figure_2_figure_supplement_1.pdf]

Figure 1- figure supplement 1

A

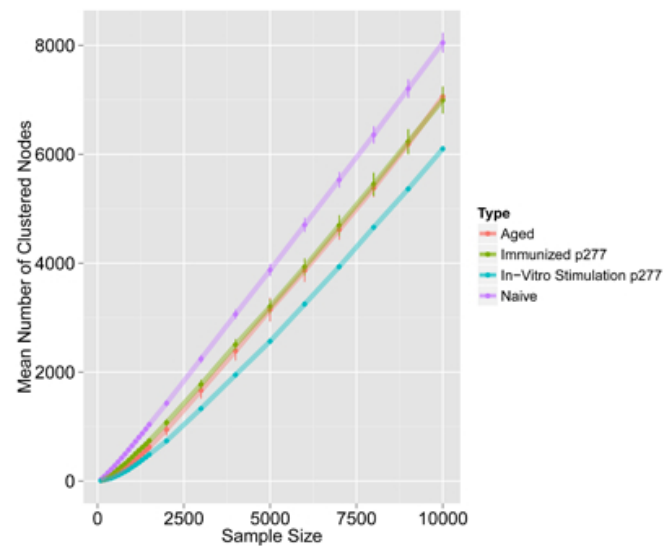

B

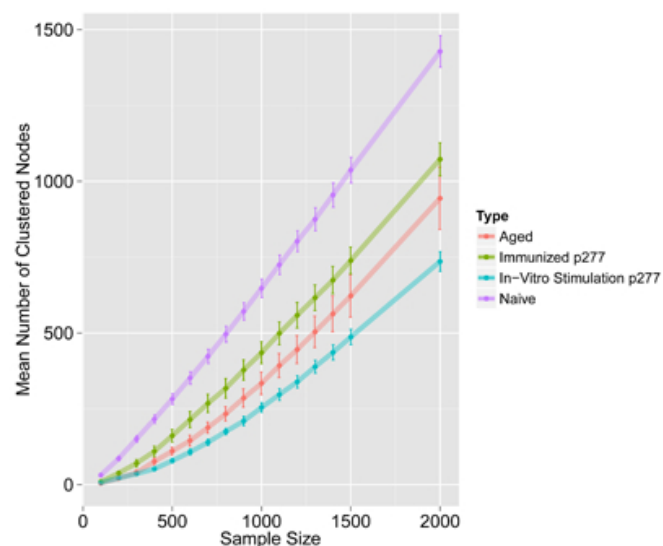

C

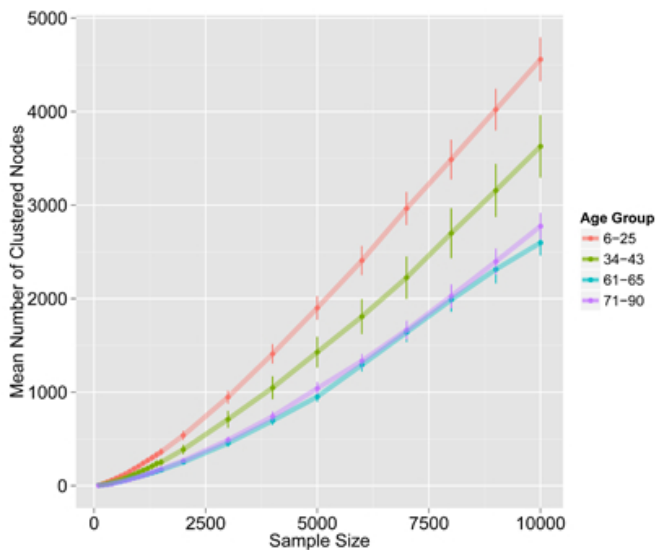

D

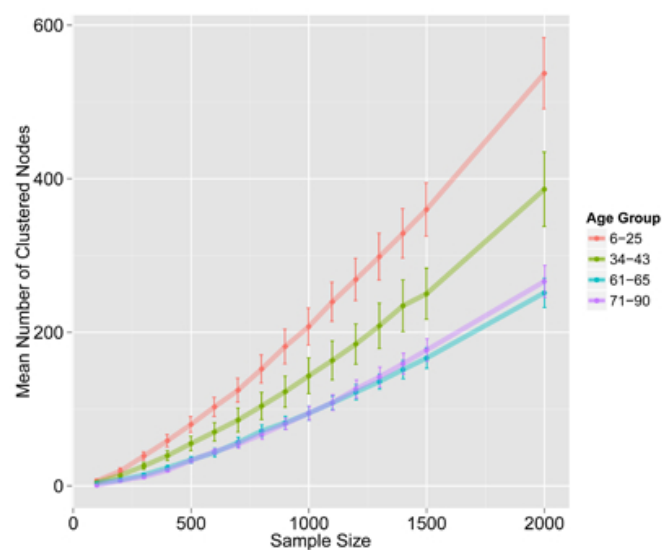

Supplement: supp [file elife-22057-supp-v1.zip › elife_poa_e22057_Figure_1_figure_supplement_1.pdf]

Figure 1- figure supplement 6

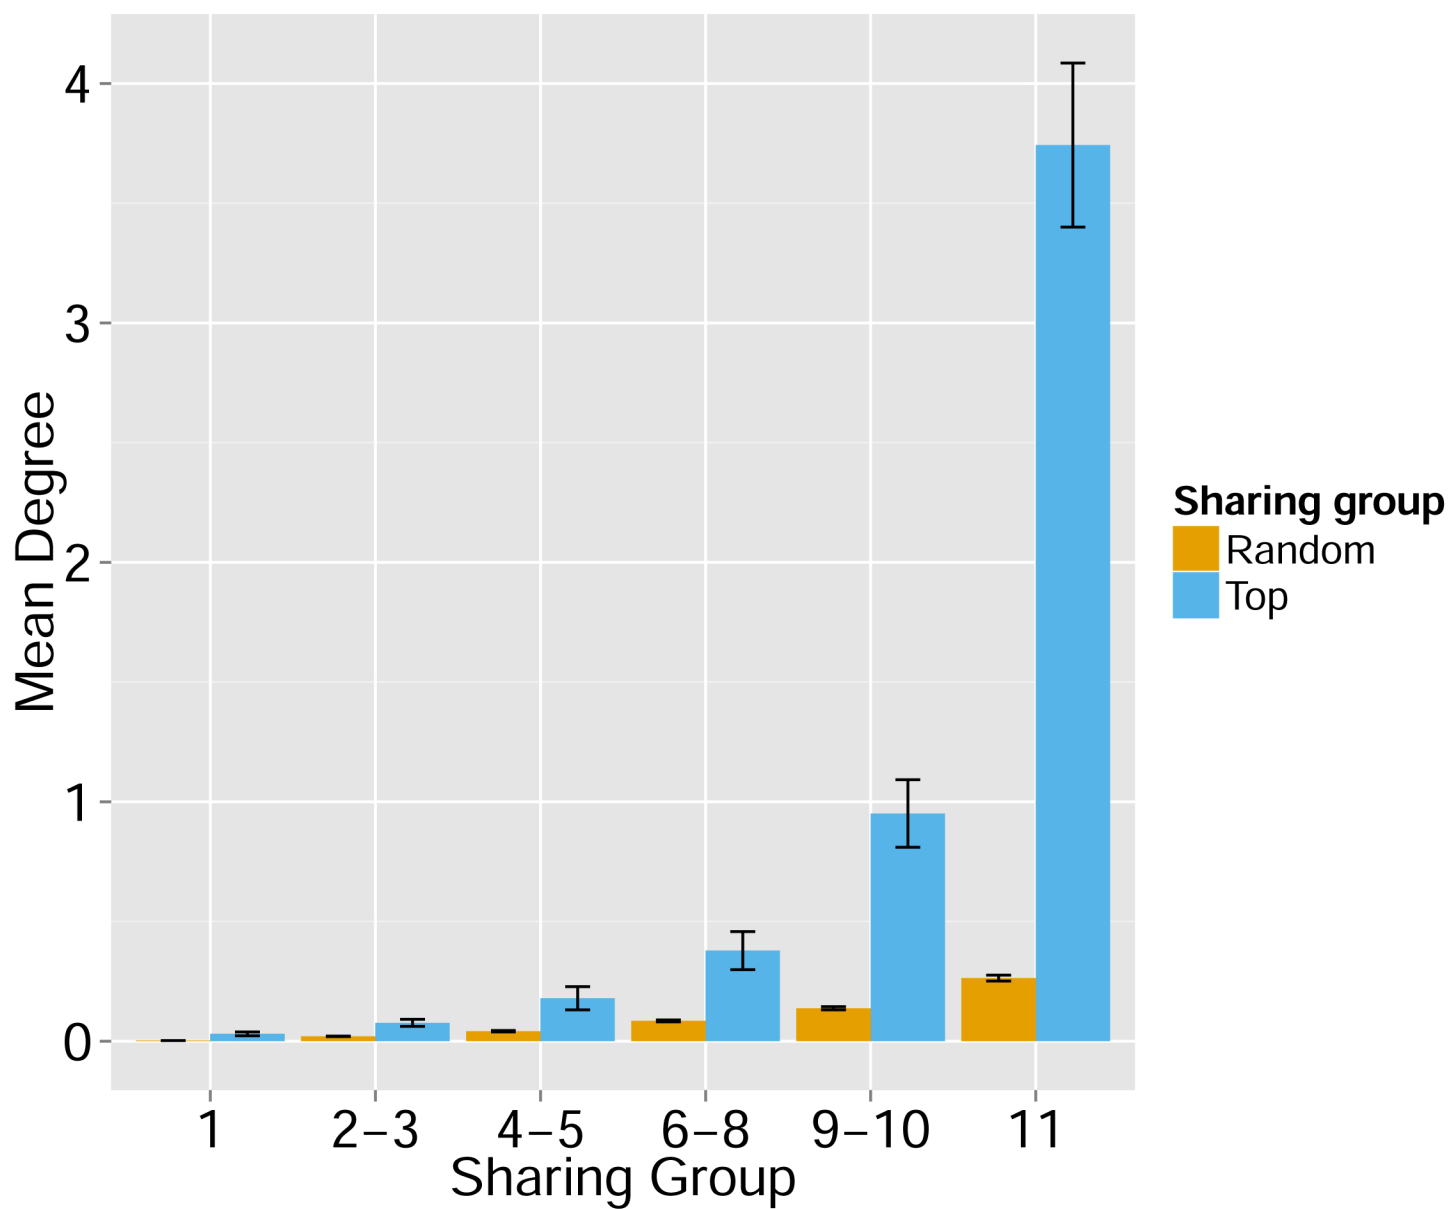

Supplement: supp [file elife-22057-supp-v1.zip › elife_poa_e22057_Figure_1_figure_supplement_6.pdf]

Figure 5 - figure supplement 5

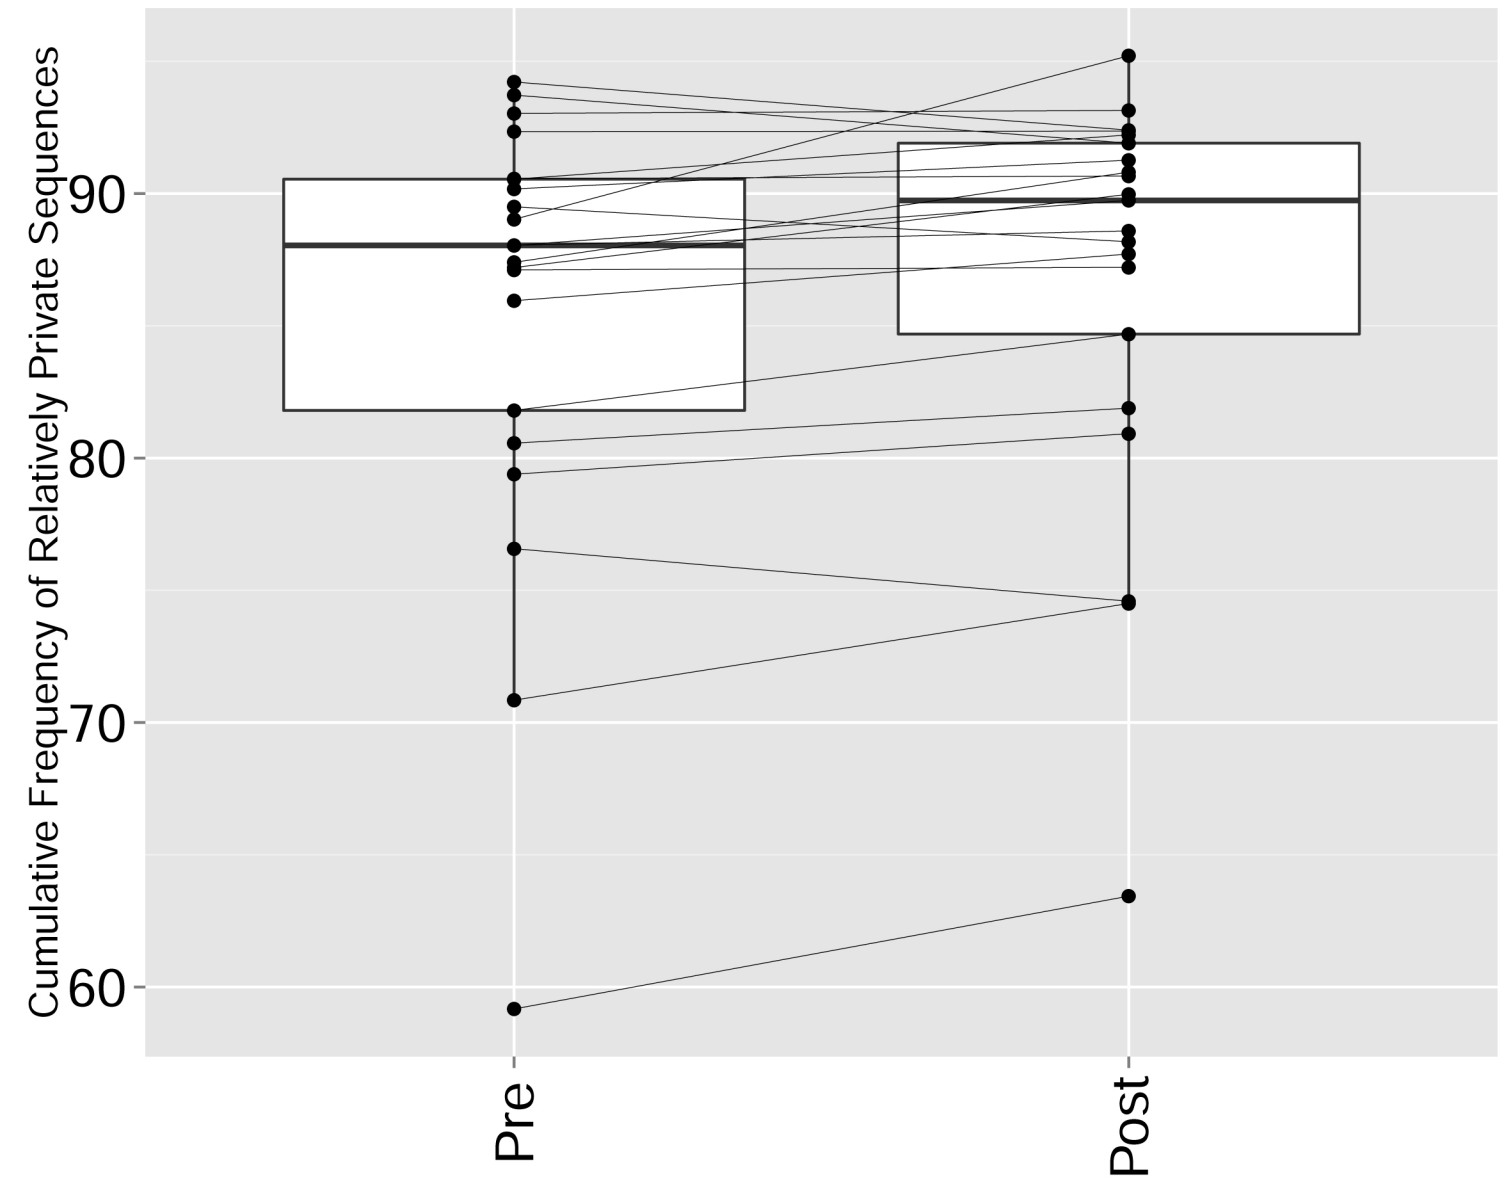

Supplement: supp [file elife-22057-supp-v1.zip › elife_poa_e22057_Figure_5_figure_supplement_5.pdf]
